# Supplementary material
Source: publisher figshare collection journal article supplement (https://aacr.figshare.com/articles/dataset/_/22758788)
Supplement: Supplementary file 1 [file 40438172]

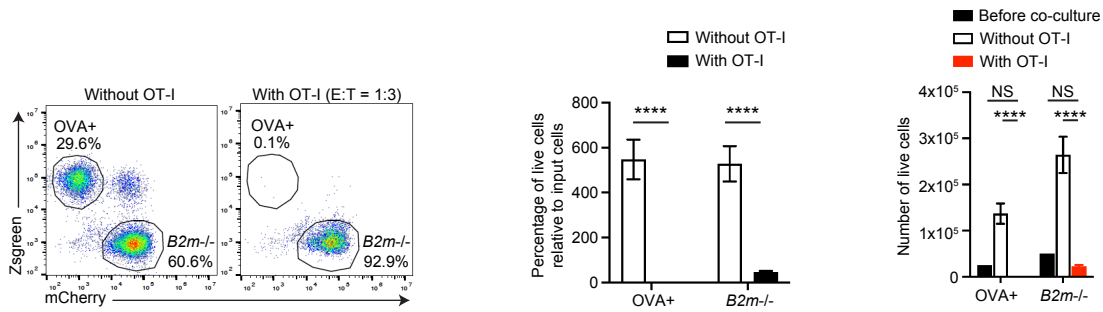

B

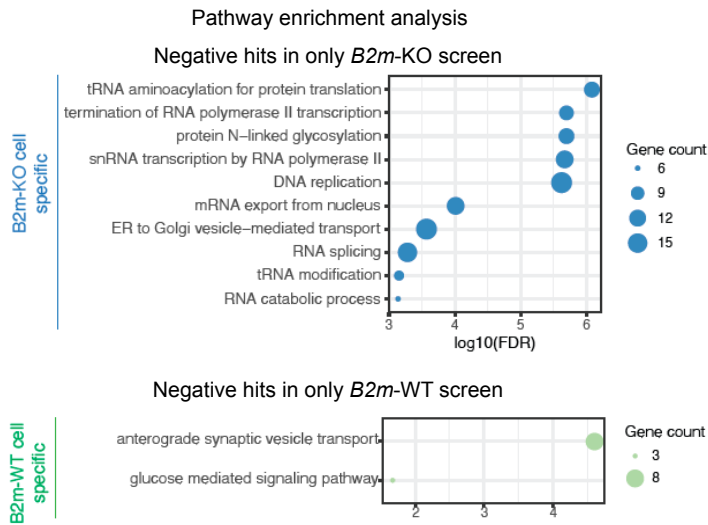

D

Positive regulators in *B2m*-KO screen and *B2m*-WT screen

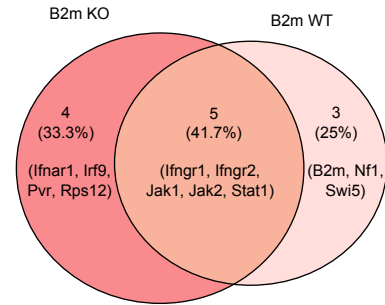

C

Comparison of regulators in *B2m*-KO screen and *B2m*-WT screen from three published studies

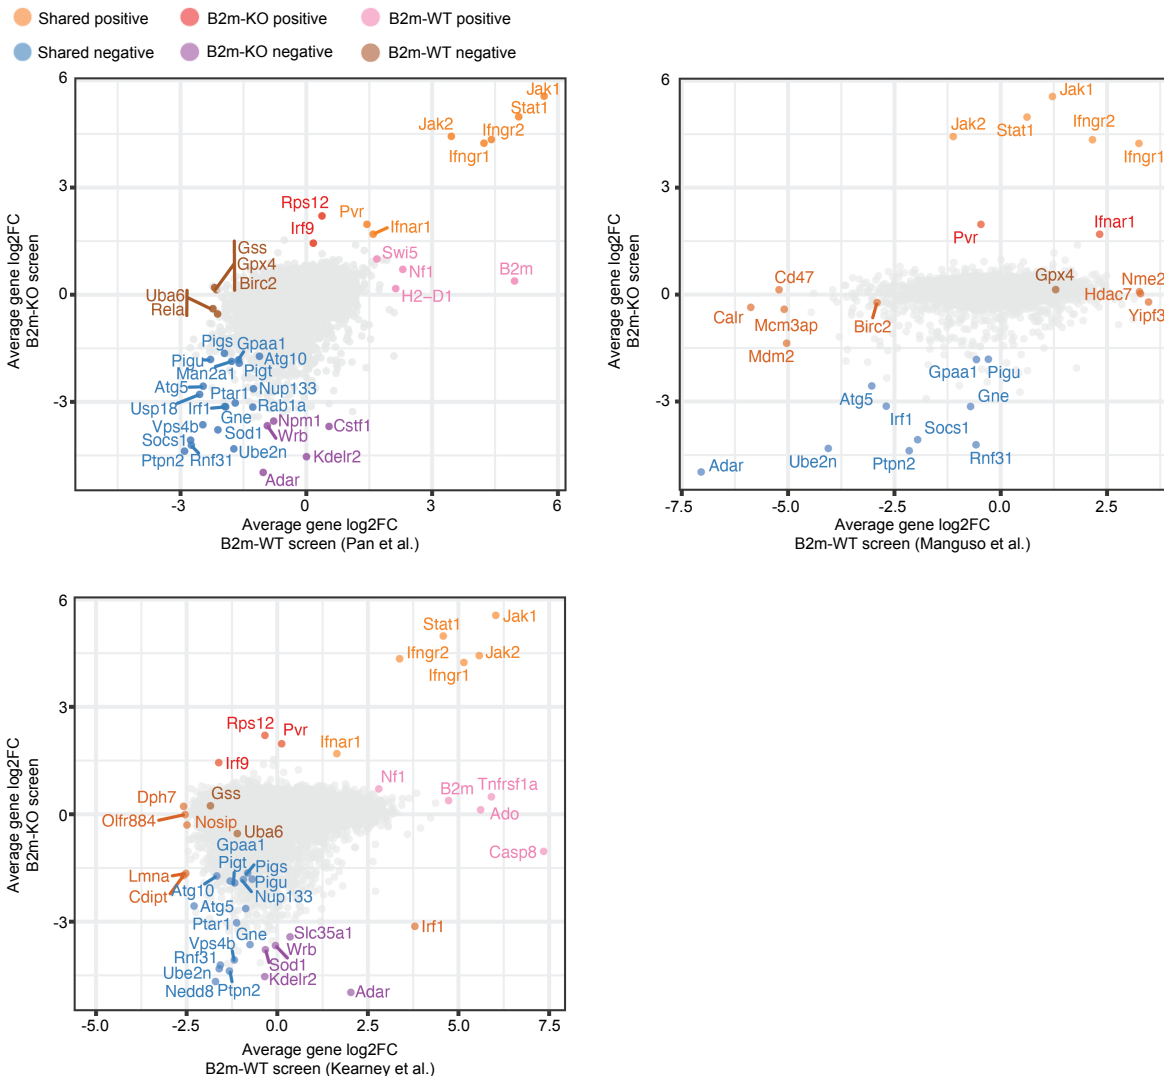

**Supplementary Fig. S1. Regulators of MHC-I independent and MHC-I dependent T cell-mediated killing.**

(A) Impact of activated T cells on the survival of *B2m*<sup>-/-</sup> tumor cells. B16-Ova cells and B16 *B2m*<sup>-/-</sup> cells were co-cultured for 48h with (E:T = 1:3) or without OT-I T cells. Representative flow cytometry plots are shown for B16-Ova cells and B16 *B2m*<sup>-/-</sup> cells that were co-cultured with OT-I T cells (E:T ratio of 1:3) or without T cells (left panel). Percentage of live cells relative to input cells (middle panel) and number of live cells (right panel) are shown (n = 5-6/group). Data are representative of two experiments. Data are depicted as the mean ± SEM. To determine statistical significance, a two-way ANOVA with Tukey's multiple comparison test was used. \*\*\*\*p < 0.0001.

(B) Pathway enrichment analysis of negative regulators (depleted gRNAs) identified only in the *B2m*-KO screen (upper panel) or only the *B2m*-WT screen (lower panel). The dot size indicates the number of genes enriched in the corresponding pathways.

(C) Pathway scatter plots comparing enrichment or depletion of gRNAs targeting the indicated genes in the current *B2m*-KO screen (Y-axis) and *B2m*-WT screens from three published studies (X-axis).

(D) Venn diagram comparing genes for positive regulators (enriched gRNAs) identified in the current screen with *B2m*-KO cells (light red, left) and a previous co-culture screen of *B2m*-WT B16F10 tumor cells with OT-I T cells (pale red, right) (1).
